# Supplementary material
Source: PubMed Central journal article supplement (PMC4507130)
Supplement: Supp_Figure1.pdf [file Supp_Figure1.pdf]

## Supplementary Data

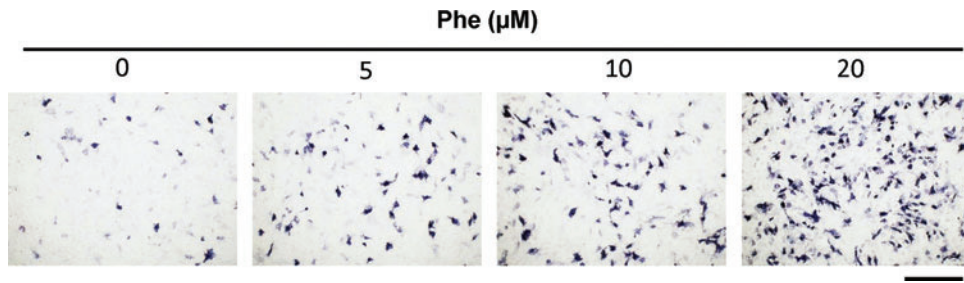

**SUPPLEMENTARY FIG. S1.** Alkaline phosphatase expression of adipose-derived stem cells (ASCs) treated with various doses of phenamil (5, 10, and 20  $\mu\text{M}$ ). Scale bar = 500  $\mu\text{m}$ .
