# Supplementary material
Source: PubMed Central journal article supplement (PMC4507130)
Supplement: Supp_Figure2.pdf [file Supp_Figure2.pdf]

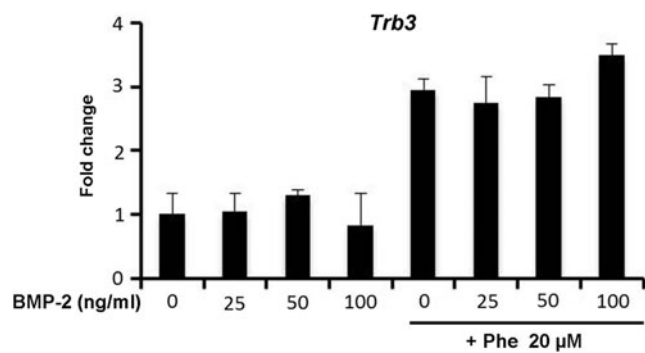

**SUPPLEMENTARY FIG. S2.** Expression of Trb3 in ASCs treated with various doses of bone morphogenetic protein-2 (25, 50, and 100 μg/mL) in the presence or absence of phenamil (20 μM).
