# Supplementary material
Source: PubMed Central journal article supplement (PMC4507130)
Supplement: Supp_Figure3.pdf [file Supp_Figure3.pdf]

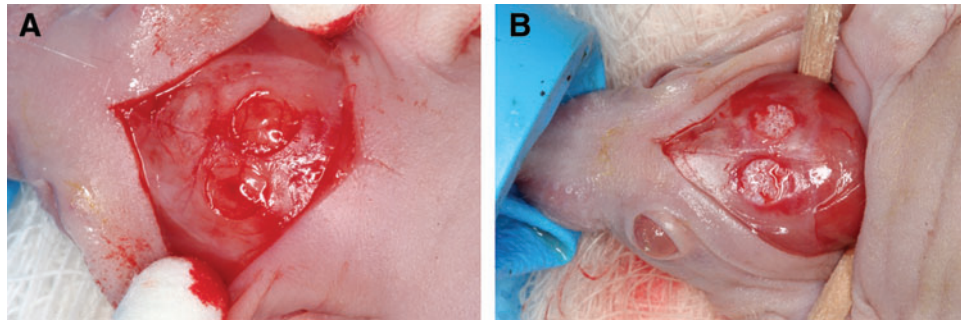

**SUPPLEMENTARY FIG. S3.** Calvarial defect model. Critical-sized (3 mm) calvarial defects were created in each parietal bone of nude mouse (A) and implanted with Ap-PLGA scaffolds (B).
